# Supplementary material
Source: PubMed Central journal article supplement (PMC263837)
Supplement: pnas_100_23_13465__5.pdf [file pnas_100_23_13465__5.pdf]

| <b>A</b>                                  |            |                |            | <b>B</b>        |                                           |           |                 |
|-------------------------------------------|------------|----------------|------------|-----------------|-------------------------------------------|-----------|-----------------|
| Dβ1                                       | P & N      | Dβ2            | P & N      | Jβ2.5           | Dβ2                                       | P & N     | Jβ2.7           |
| GGGACAGGGGGC                              |            | GGGACTGGGGGGGC |            | AACCAAGACACCCAG | GGGACTGGGGGGGC                            |           | CTCCTATGAACAGTA |
| <b>Eβ<sup>R/R</sup></b>                   |            |                |            |                 | <b>Eβ<sup>R/R</sup> p53<sup>-/-</sup></b> |           |                 |
| GGGACAGGG                                 | <u>CCT</u> | GGGG           |            | AACCAAGACACCCAG | GGGACTGGGGG                               |           | TA              |
| GGGACAGGGGG                               |            |                |            | CAAGACACCCAG    | GGGACTGGGGG                               |           | GAACAGTA        |
| <b>Eβ<sup>R/R</sup> p53<sup>-/-</sup></b> |            |                |            |                 | GGGACTGGGGG                               |           | CTATGAACAGTA    |
| GGGACAG                                   | <u>CC</u>  | GGGACTGGGGG    | AGG        | GACACCCAG       | GGGACTGGGGG                               |           | CCTATGAACAGTA   |
| GGGACAGGGGG                               |            | GGACTGGGGGG    | CCCCCGATTT | AACCAAGACACCCAG | GGGACTGGGGGGG                             |           | GAACAGTA        |
| GGGACAGGGG                                |            | ACTGGGG        | TCCAAA     | ACACCCAG        | GGGACTGGGGGGGGC                           |           | TATGAACAGTA     |
| GGGACAGGGG                                |            | ACTGGGGGGG     | ATGT       | AAGACACCCAG     | GGGACTGGGGGGGC                            | T         | TATGAACAGTA     |
| GGGGACAGGG                                |            | ACTGGGGGGGC    | GC         | ACCAAGACACCCAG  | GGGACTGGGG                                | A         | CTATGAACAGTA    |
| GGGACAG                                   |            | ACTGGGGGGGC    | GCATCC     | AGACACCCAG      | GGGACTGGGG                                | A         | CTCCTATGAACAGTA |
| GGGGACAGGG                                | CNC        | GGGGG          | ATN        | CAAGACACCCAG    | GGGACTGGGG                                | TA        | CCTATGAACAGTA   |
| GGGACAGGGGG                               | GC         | GC             | G          | ACCAAGACACCCAG  | GGGACTGGGGG                               | AT        | TATGAACAGTA     |
|                                           |            |                |            |                 | GGGACTGGGGG                               | TC        | CCTATGAACAGTA   |
|                                           |            |                |            | <b>Jβ2.4</b>    | GGGACTGGGGGGG                             | GG        | GAACAGTA        |
|                                           |            |                |            | AGTCAAAACACCTTG | GGGACTG                                   | AAG       | CTCCTATGAACAGTA |
| <b>Eβ<sup>R/R</sup></b>                   |            |                |            |                 | GGGACTGGGGGGGC                            | CTC       | ATGAACAGTA      |
| GGGACAGGGG                                | A          | GGGGGGG        | AGGAGGGAGT | AGTCAAAACACCTTG | GGGACTGGGGG                               | CCTA      | TATGAACAGTA     |
| <b>Eβ<sup>R/R</sup> p53<sup>-/-</sup></b> |            |                |            |                 | GGGACTGGGGG                               | TCAA      | TCCTATGAACAGTA  |
| GGGACAG                                   | ACC        | CTGGGGGGG      | GT         | AGTCAAAACACCTTG | GGGACTGGGGGGG                             | GCGGG     | GAACAGTA        |
| GGGACAGGGGGC                              |            | TGGGGGGGC      | GC         | CAAAACACCTTG    | GGGACTGGGG                                | ACCTNT    | TATGAACAGTA     |
| GGGACAGGGGG                               | A          | GGGGG          | TTCCT      | AGTCAAAACACCTTG | <b>Eβ<sup>R/R</sup></b>                   |           |                 |
|                                           |            |                |            |                 | GGGACTG                                   |           | CTCCTATGAACAGTA |
|                                           |            |                |            | <b>Jβ2.3</b>    | GGGACTG                                   | TT        | TATGAACAGTA     |
|                                           |            |                |            | AGTGCAGAAACGCTG | GGGACTGGGGG                               | <u>AG</u> | CTCCTATGAACAGTA |
| <b>Eβ<sup>R/R</sup> p53<sup>-/-</sup></b> |            |                |            |                 |                                           |           |                 |
| GGGACAG                                   |            |                |            | TGCAGAAACGCTG   |                                           |           | <b>Jβ2.5</b>    |
| GGGACAGGGG                                | CAATCATAA  | CTGGGG         | CT         | AGTGCAGAAACGCTG |                                           |           | AACCAAGACACCCAG |
| GGAACAGGG                                 | T          | CTGGGGGGG      | TTG        | AGTGCAGAAACGCTG | <b>Eβ<sup>R/R</sup> p53<sup>-/-</sup></b> |           |                 |
|                                           |            |                |            |                 | GGGACTGGGG                                |           | AACCAAGACACCCAG |
|                                           |            |                |            | <b>Jβ2.2</b>    | GGGACTGGGGGG                              | AGGGGA    | AAGACACCCAG     |
| <b>Eβ<sup>R/R</sup> p53<sup>-/-</sup></b> |            |                |            | ACACCGGGCAGCTCT |                                           |           |                 |
| GGGACAGG                                  | A          | GGGACTGGGGGG   | TGCAG      | GGGCAGCTCT      |                                           |           | <b>Jβ2.4</b>    |
|                                           |            |                |            |                 | <b>Eβ<sup>R/R</sup></b>                   |           | AGTCAAAACACCTTG |
|                                           |            |                |            |                 | <b>Eβ<sup>R/R</sup></b>                   | GGGAAA    | AGTCAAAACACCTTG |
|                                           |            |                |            |                 | GGGACTGGGGG                               |           | <b>Jβ2.2</b>    |
|                                           |            |                |            |                 |                                           |           | ACACCGGGCAGCTCT |
|                                           |            |                |            |                 | <b>Eβ<sup>R/R</sup> p53<sup>-/-</sup></b> |           |                 |
|                                           |            |                |            |                 | GGGACTGGGGGGG                             | TTTCAA    | ACACCGGGCAGCTCT |
