# Supplementary material
Source: PubMed Central journal article supplement (PMC263837)

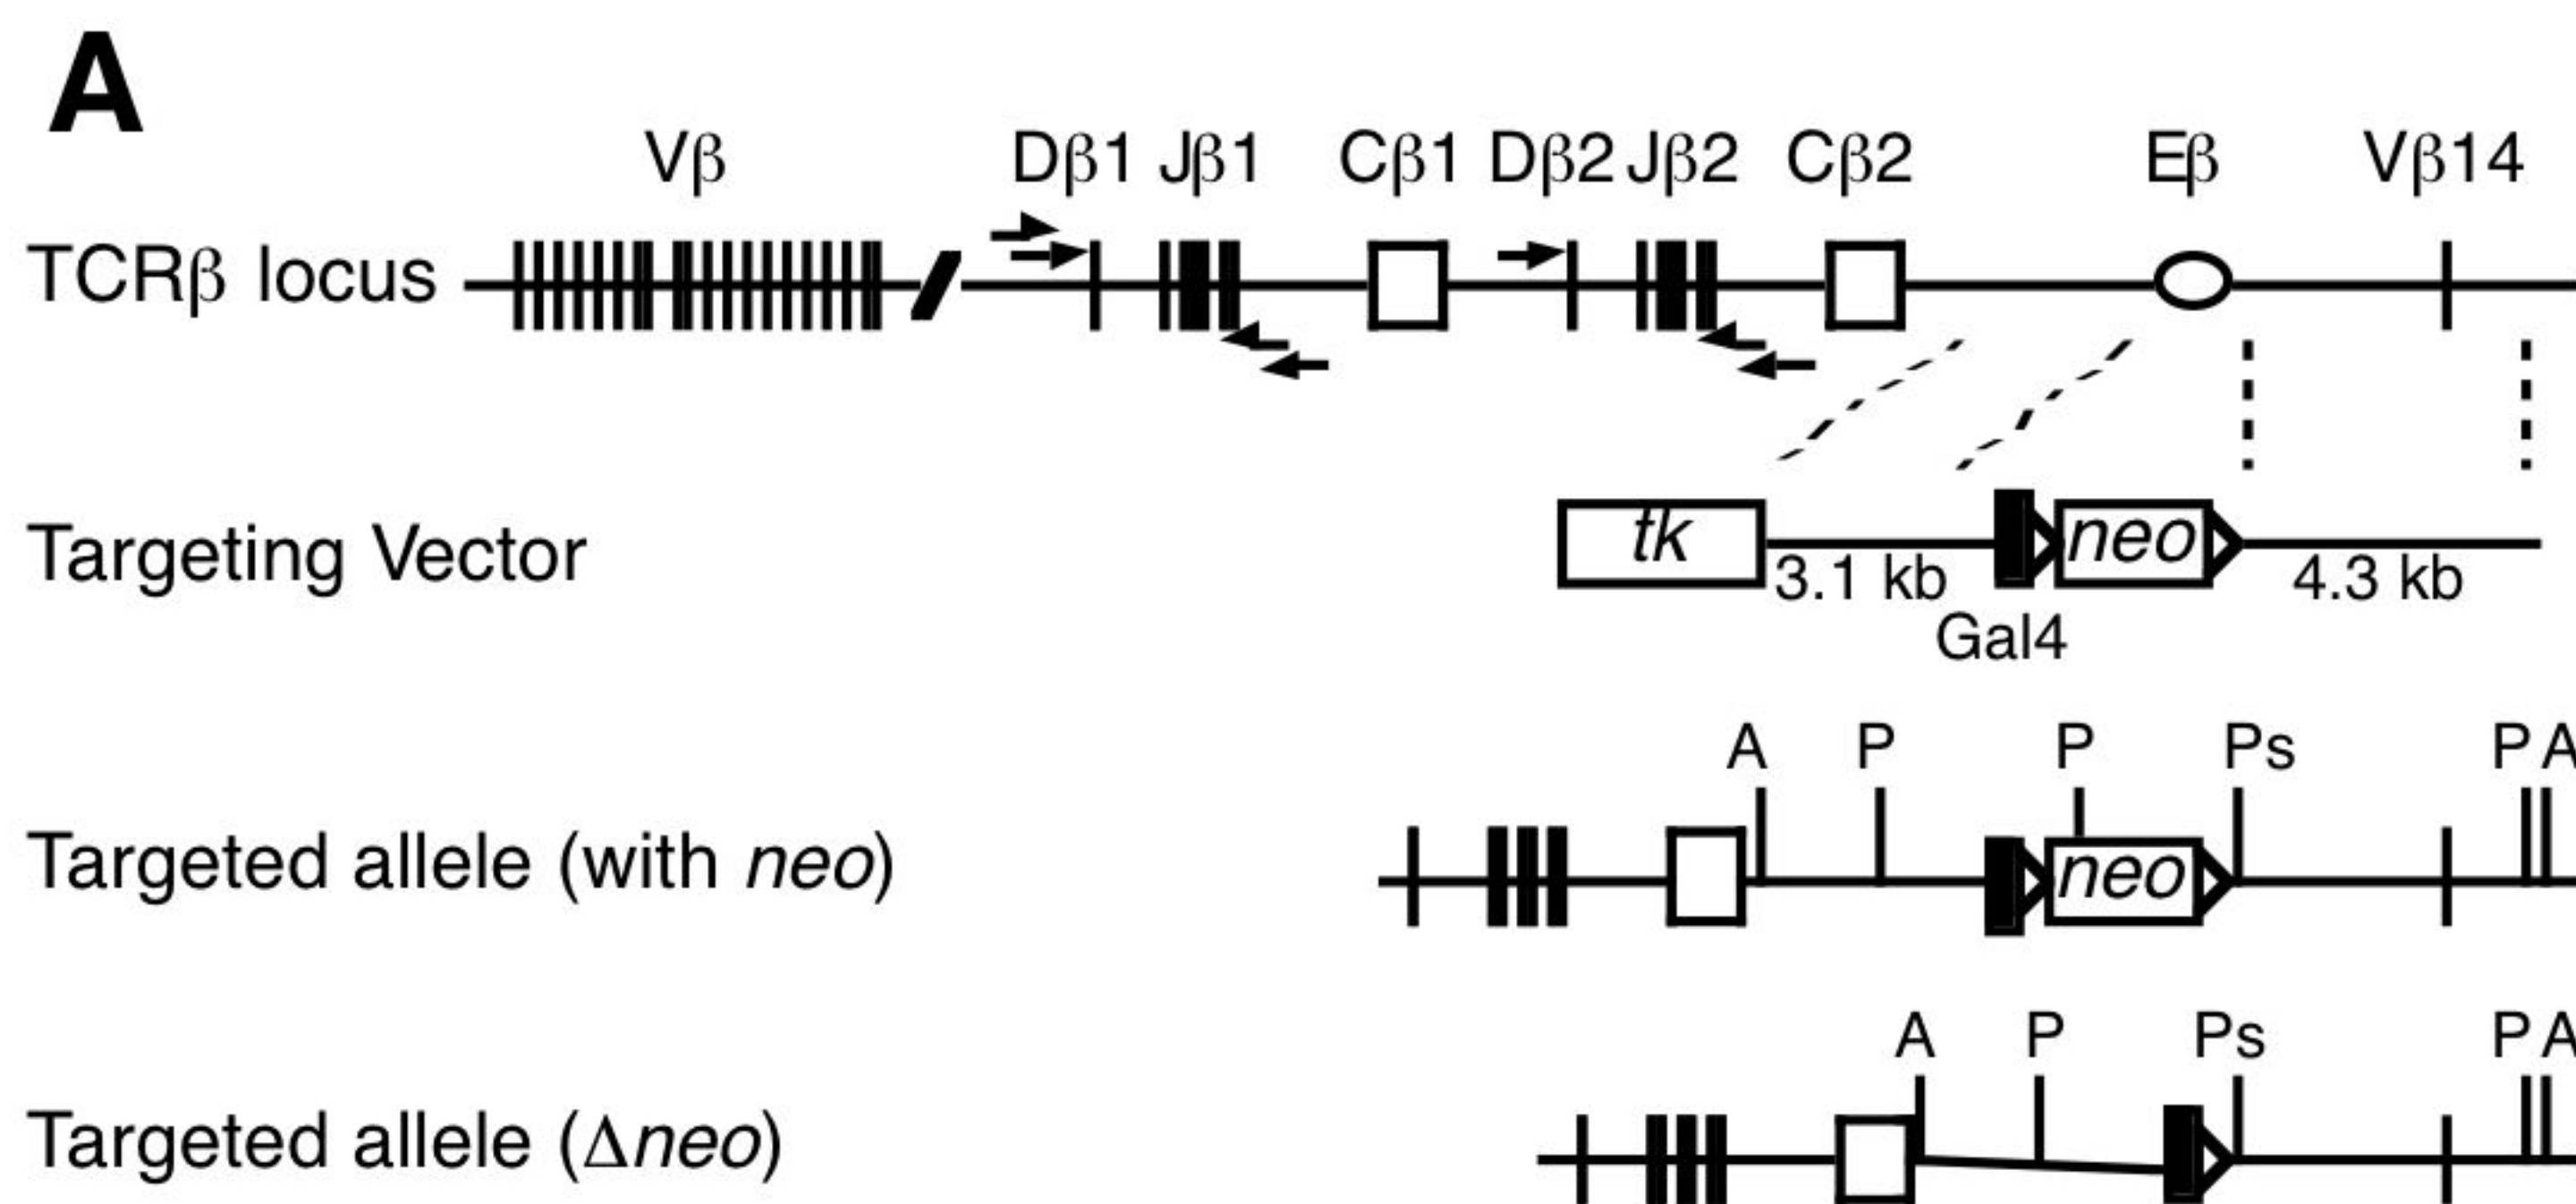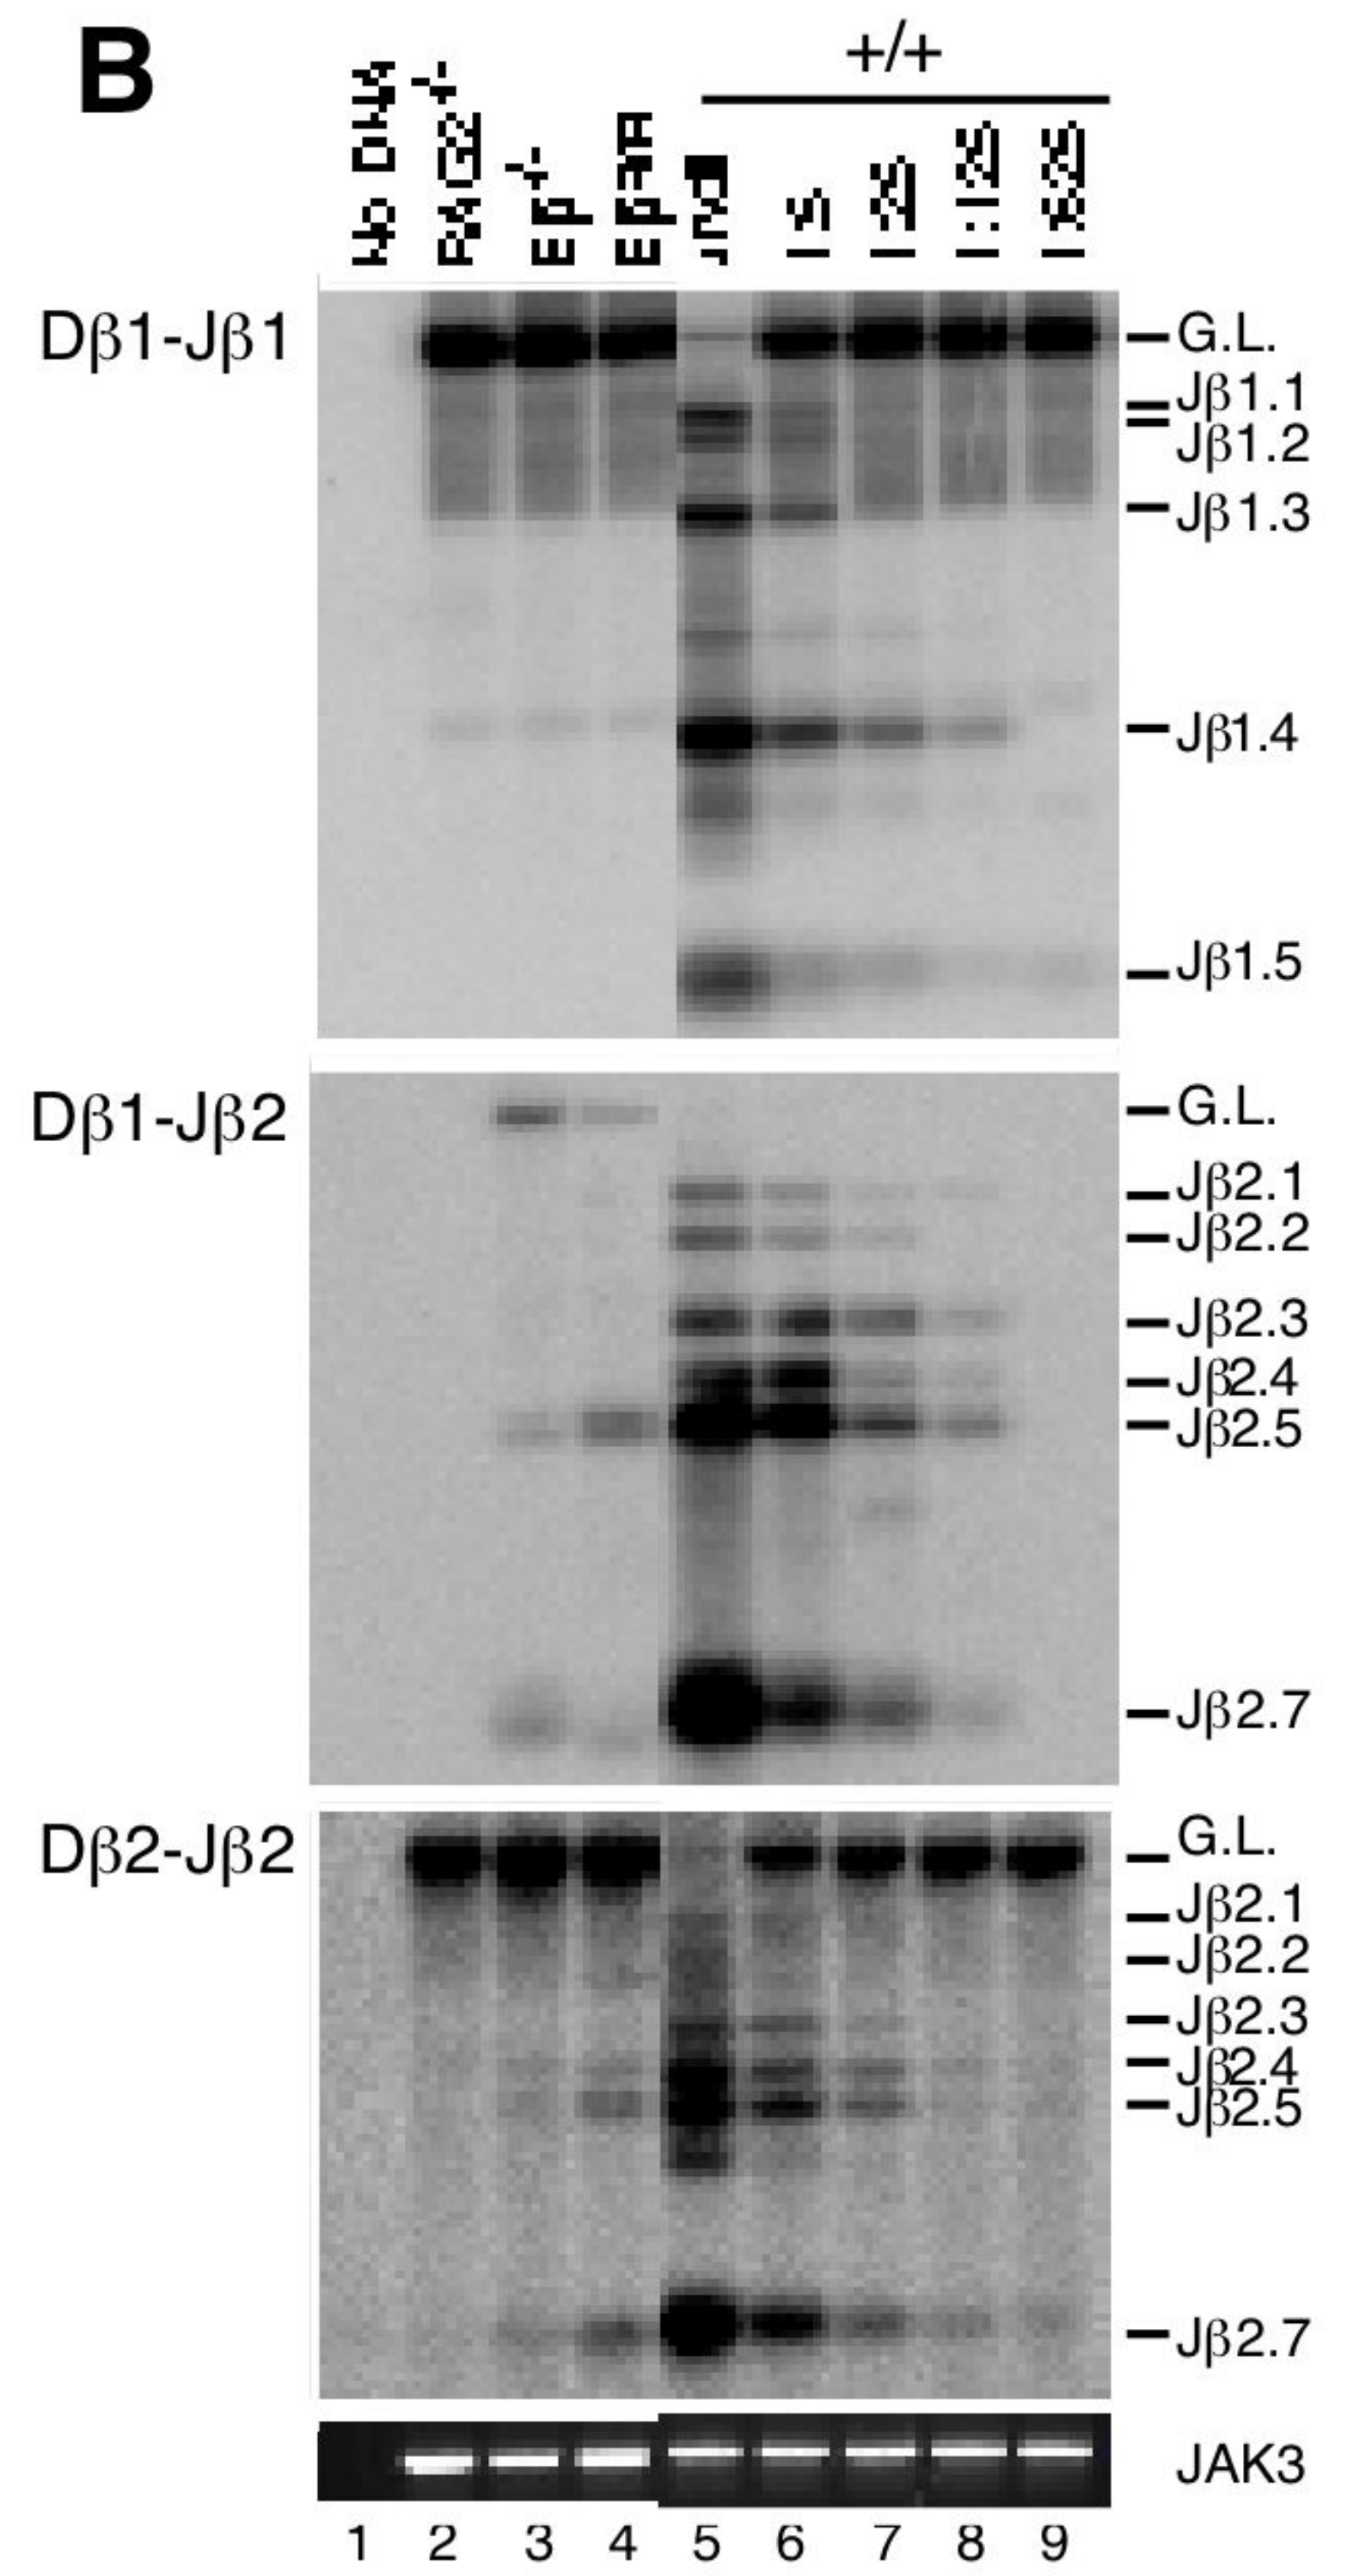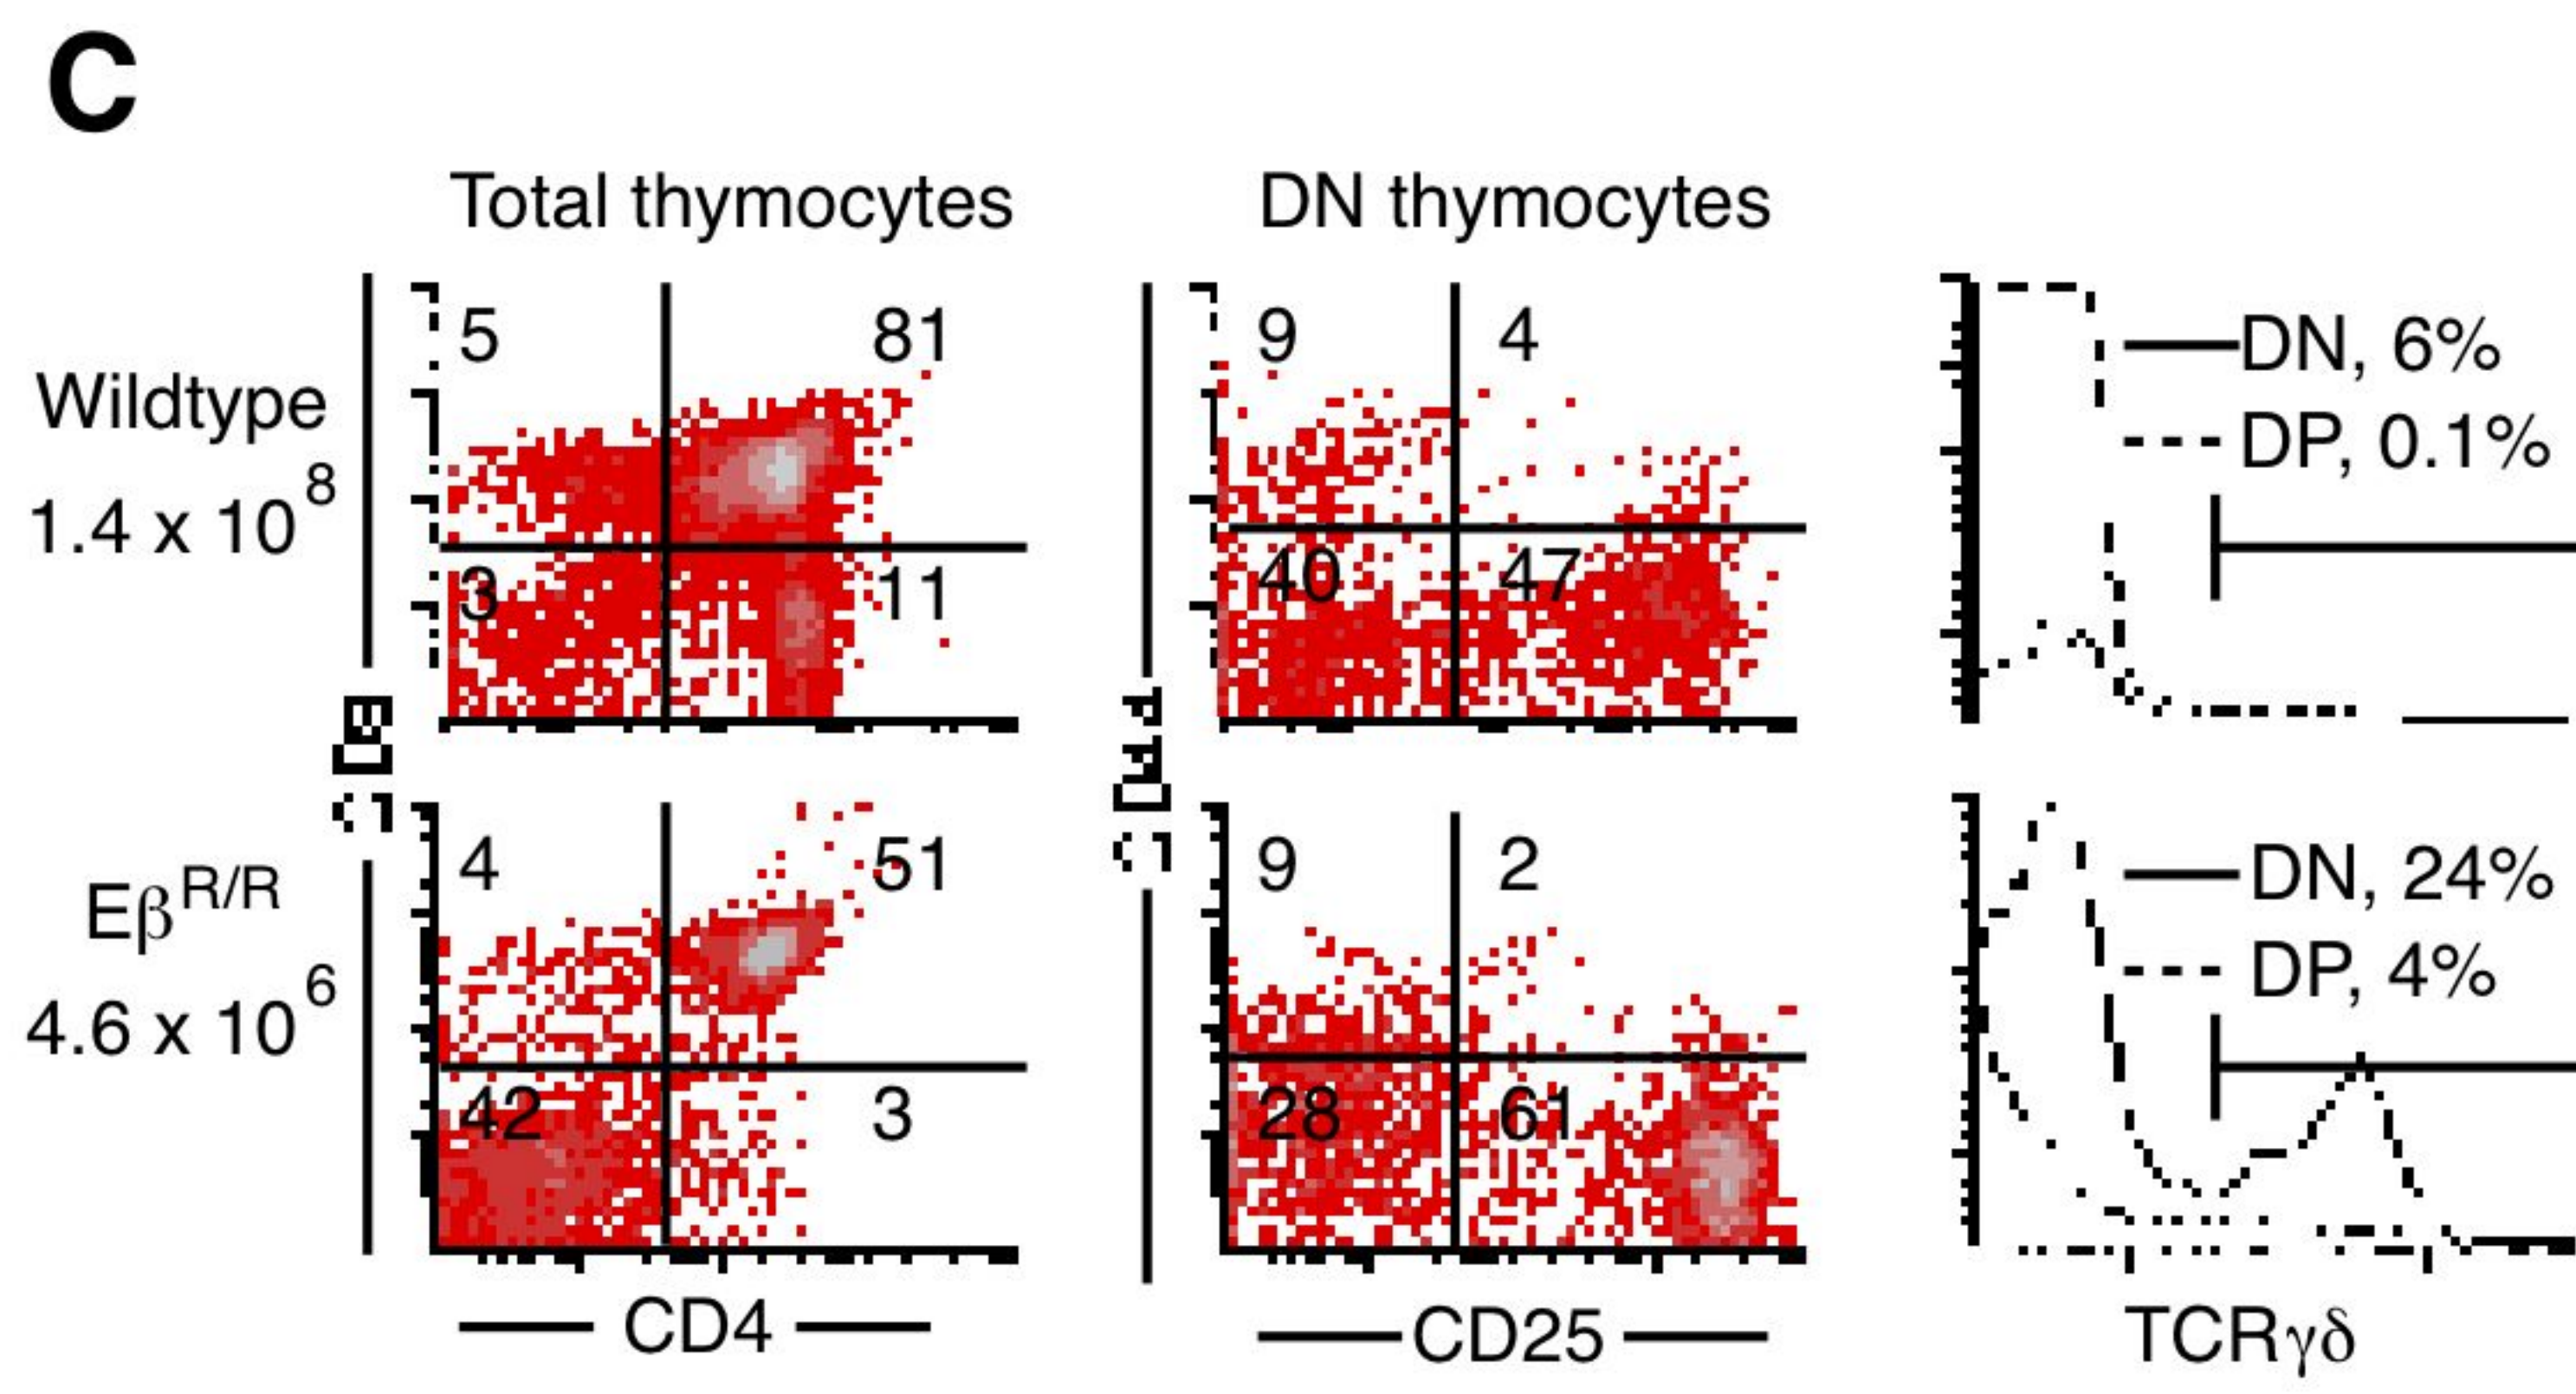

Supplement: pnas_100_23_13465__2.pdf [file pnas_100_23_13465__2.pdf]
